# Supplementary material
Source: MDPI journal article supplement (https://www.mdpi.com/2313-0105/9/7/342)
Supplement: s1 [file s1 › batteries-2409811-supplementary.pdf]

A Comparative Mechanistic Study on the Intercalation Reactions of  $\text{Mg}^{2+}$  and  $\text{Li}^+$  Ions into  
 $(\text{Mg}_{0.5}\text{Ni}_{0.5})_3(\text{PO}_4)_2$

\*M. Romio<sup>1</sup>, Y. Surace<sup>1</sup>, A. Mautner<sup>2,3</sup>, R. Hamid<sup>1</sup>, M. Jahn<sup>1</sup>, D. M. Cupid<sup>1</sup>, I. Abrahams<sup>4</sup>

<sup>1</sup>AIT Austrian Institute of Technology GmbH, Centre for Low-Emission Transport,  
Giefinggasse 2, 1210 Vienna, Austria.

<sup>2</sup> Department of Materials Chemistry, Universität Wien, Währinger Straße 42, 1090, Vienna,  
Austria.

<sup>3</sup> Institute for Environmental Biotechnology, Department IFA, University of Natural  
Resources and Life Sciences Vienna, Konrad-Lorenz-Straße 20, 3430 Tulln an der Donau,  
Austria

<sup>4</sup> Department of Chemistry, Queen Mary University of London, Mile End Rd, London E1  
4NS, United Kingdom.

## Supplementary Information

**Table S1.** Crystal and refinement parameters for MNP at room temperature.

|                                           |                                                                                                                                                  |
|-------------------------------------------|--------------------------------------------------------------------------------------------------------------------------------------------------|
| Nominal composition                       | Mg <sub>1.5</sub> Ni <sub>1.5</sub> O <sub>8</sub> P <sub>2</sub>                                                                                |
| Primary phase                             | (Mg <sub>0.5</sub> Ni <sub>0.5</sub> ) <sub>3</sub> (PO <sub>4</sub> ) <sub>2</sub>                                                              |
| Weight fraction primary phase             | 0.99214(4)                                                                                                                                       |
| Formula weight primary phase              | 314.48 g mol <sup>-1</sup>                                                                                                                       |
| Crystal system primary phase              | Monoclinic                                                                                                                                       |
| Space group primary phase                 | <i>P</i> 2 <sub>1</sub> / <i>c</i>                                                                                                               |
| Unit cell dimensions primary phase        | <i>a</i> = 5.8860(1) Å<br><i>b</i> = 4.70841(9) Å<br><i>c</i> = 10.1717(2) Å<br><i>β</i> = 90.777(1)°                                            |
| Volume primary phase                      | 281.87(1) Å <sup>3</sup>                                                                                                                         |
| Z primary phase                           | 2                                                                                                                                                |
| Density (calculated) primary phase        | 3.705 g cm <sup>-3</sup>                                                                                                                         |
| Secondary phase                           | NiO                                                                                                                                              |
| Weight fraction secondary phase           | 0.0078(5)                                                                                                                                        |
| Formula weight secondary phase            | 74.71 g mol <sup>-1</sup>                                                                                                                        |
| Crystal system secondary phase            | Trigonal                                                                                                                                         |
| Space group secondary phase               | <i>R</i> -3 <i>m</i>                                                                                                                             |
| Lattice parameter secondary phase         | <i>a</i> = 2.961(1) Å, <i>c</i> = 7.231(7) Å                                                                                                     |
| Volume secondary phase                    | 54.91(3) Å <sup>3</sup>                                                                                                                          |
| Z secondary phase                         | 3                                                                                                                                                |
| Density (calculated) secondary phase      | 6.777 g cm <sup>-3</sup>                                                                                                                         |
| R-factors                                 | R <sub>wp</sub> = 0.0188<br>R <sub>p</sub> = 0.0111<br>R <sub>ex</sub> = 0.0061<br>R <sub>F</sub> <sup>2</sup> = 0.0716<br>χ <sup>2</sup> = 9.44 |
| No. of observations/restraints/parameters | 3290/0/46                                                                                                                                        |
| Total no. of reflections used             | 888                                                                                                                                              |

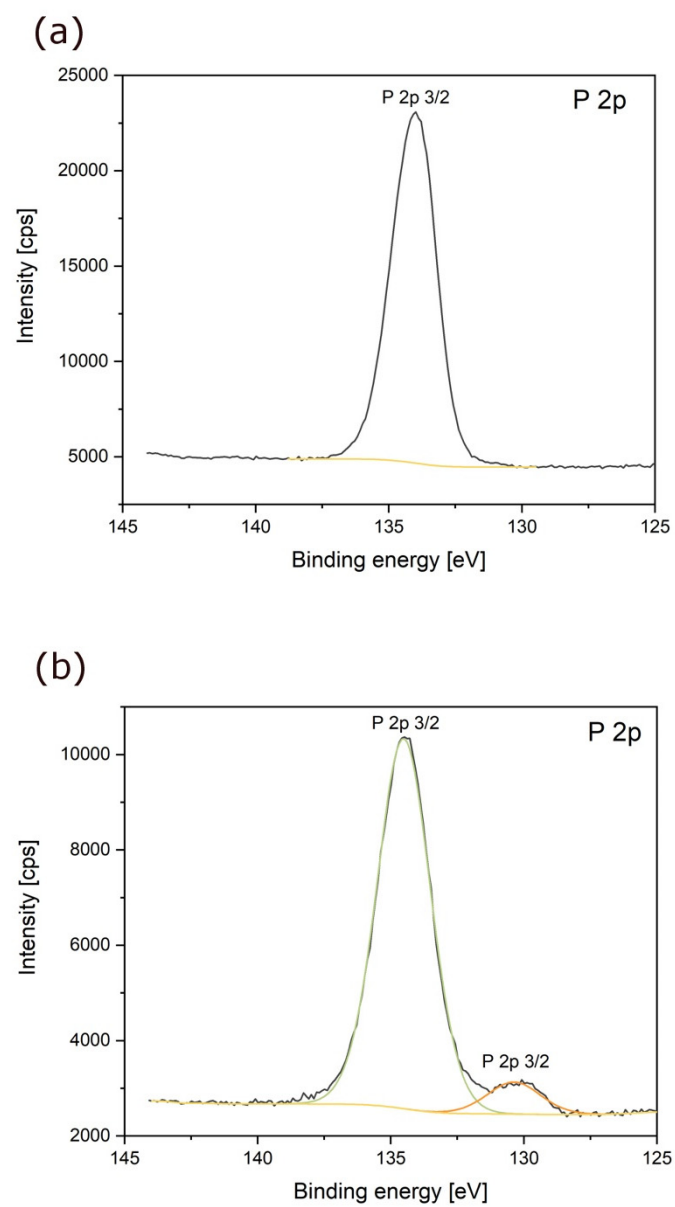

**Figure S1.** P 2p X-ray photoelectron spectra for MNP powder (a) before and (b) after Ar-ion etching.

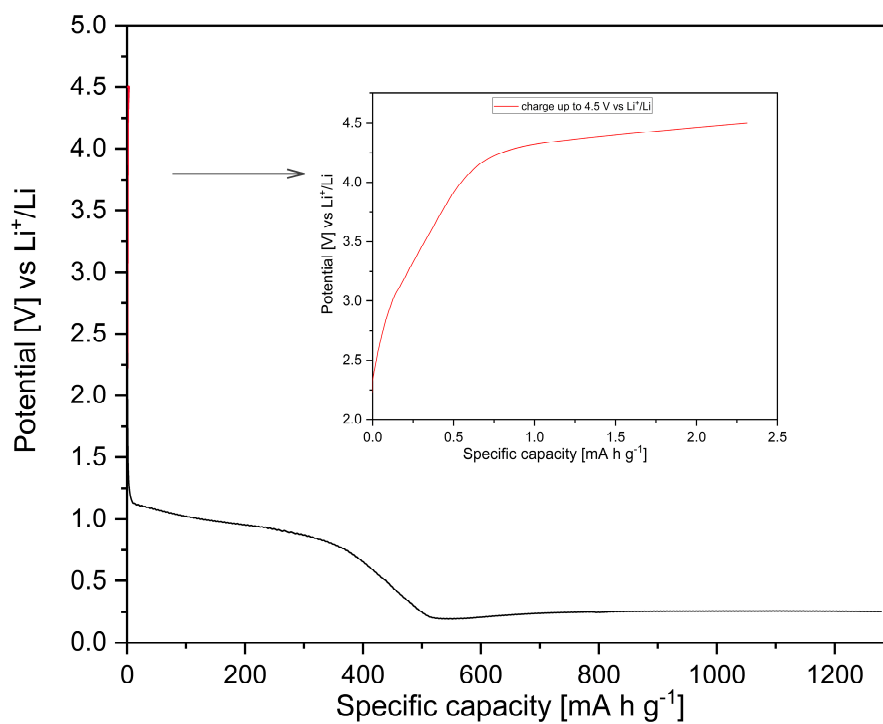

**Figure S2.** Charge (red line) and discharge (black line) curves for MNP active material, coated on Al and cycled in a Li-half cell with Li-electrolyte between 4.5 V and 0.25 V vs.  $\text{Li}^+/\text{Li}$ . The inset shows the poor charging behaviour of MNP (red line) up to 4.5 V vs.  $\text{Li}^+/\text{Li}$ .

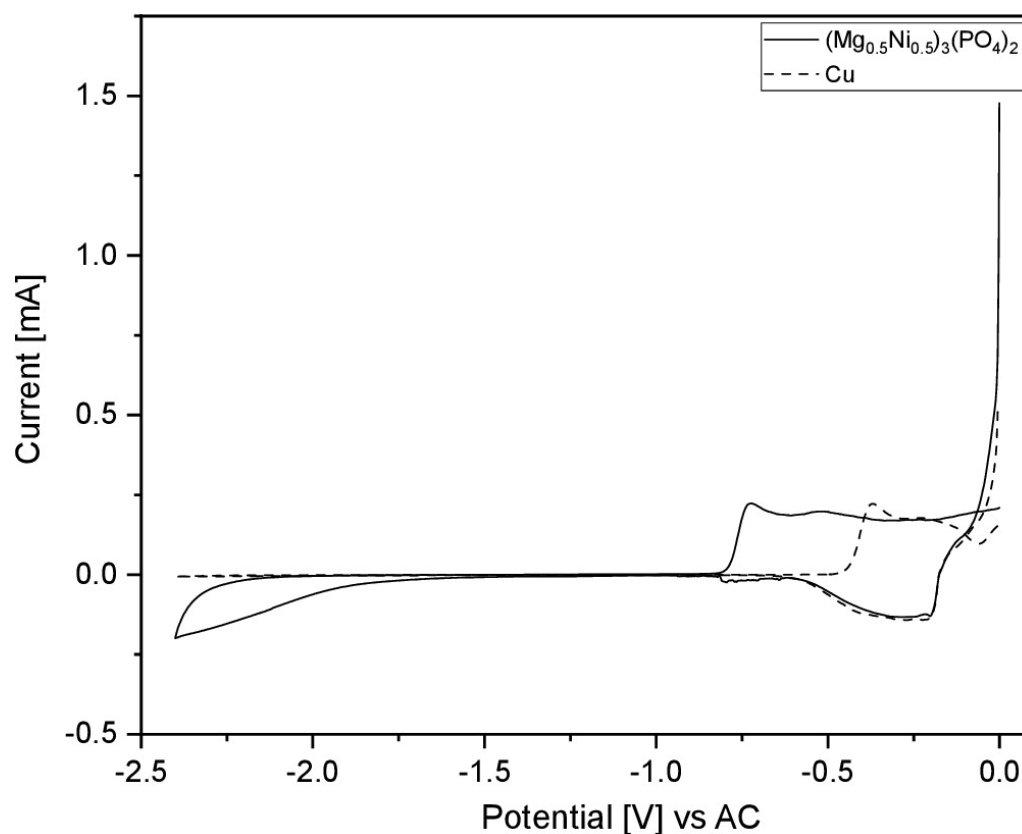

**Figure S3.** Cyclic voltammograms of MNP (solid-line) and Cu (dashed) working electrodes recorded at a scan rate of  $0.07 \text{ mV s}^{-1}$  using AC as the counter electrode and Mg-electrolyte. Irregular effects, associated with an interaction between the Cu current collector and the electrolyte, were observed at *ca.*  $-0.75 \text{ V vs. AC}$  and  $-0.3 \text{ V vs. AC}$  for the MNP and Cu working electrodes, respectively. Therefore, further galvanostatic discharge-charge cycling of the MNP working electrode was performed in the voltage window between  $-2.4 \text{ V}$  and  $-0.8 \text{ V vs. AC}$ .

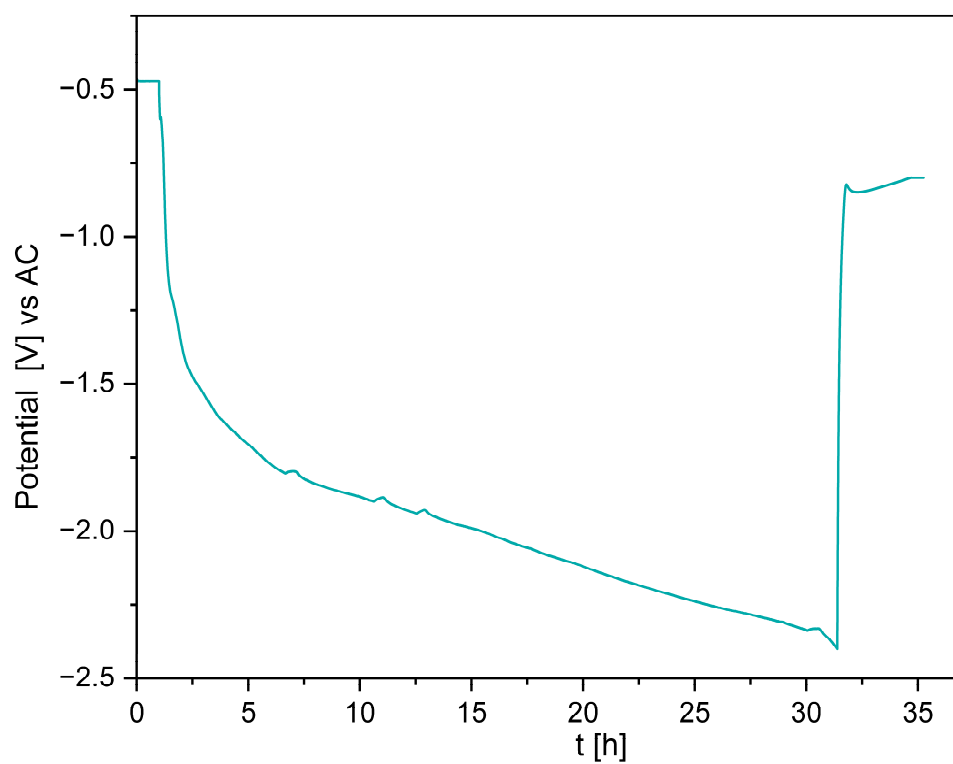

**Figure S4.** Charge and discharge curves with constant voltage step for MNP vs AC-Mg electrolyte cell.

**Table S2.** Crystal and refinement parameters for the MNP pristine electrode.

|                                           |                                                                                                                                                                                      |
|-------------------------------------------|--------------------------------------------------------------------------------------------------------------------------------------------------------------------------------------|
| Nominal composition                       | Mg <sub>1.5</sub> Ni <sub>1.5</sub> O <sub>8</sub> P <sub>2</sub>                                                                                                                    |
| Primary phase                             | (Mg <sub>0.5</sub> Ni <sub>0.5</sub> ) <sub>3</sub> (PO <sub>4</sub> ) <sub>2</sub>                                                                                                  |
| Weight fraction primary phase             | 0.42(7)                                                                                                                                                                              |
| Formula weight primary phase              | 314.48 g mol <sup>-1</sup>                                                                                                                                                           |
| Crystal system primary phase              | Monoclinic                                                                                                                                                                           |
| Space group primary phase                 | <i>P</i> 2 <sub>1</sub> / <i>c</i>                                                                                                                                                   |
| Unit cell dimensions primary phase        | <i>a</i> = 5.8808(3) Å<br><i>b</i> = 4.7060(3) Å<br><i>c</i> = 10.1656(5) Å<br><i>β</i> = 90.80(0)°                                                                                  |
| Volume primary phase                      | 281.30(9) Å <sup>3</sup>                                                                                                                                                             |
| Z primary phase                           | 2                                                                                                                                                                                    |
| Density (calculated) primary phase        | 3.172 g cm <sup>-3</sup>                                                                                                                                                             |
| Secondary phase                           | Cu                                                                                                                                                                                   |
| Weight fraction secondary phase           | 0.536(2)                                                                                                                                                                             |
| Formula weight secondary phase            | 63.55 g mol <sup>-1</sup>                                                                                                                                                            |
| Crystal system secondary phase            | Cubic                                                                                                                                                                                |
| Space group secondary phase               | <i>Fm</i> -3 <i>m</i>                                                                                                                                                                |
| Lattice parameter secondary phase         | <i>a</i> = 3.61438(8) Å                                                                                                                                                              |
| Volume secondary phase                    | 42.21(7) Å <sup>3</sup>                                                                                                                                                              |
| Z secondary phase                         | 4                                                                                                                                                                                    |
| Density (calculated) secondary phase      | 8.939 g cm <sup>-3</sup>                                                                                                                                                             |
| Tertiary phase                            | Mg <sub>2</sub> P <sub>2</sub> O <sub>7</sub>                                                                                                                                        |
| Weight fraction tertiary phase            | 0.036(8)                                                                                                                                                                             |
| Formula weight tertiary phase             | 222.55 g mol <sup>-1</sup>                                                                                                                                                           |
| Crystal system tertiary phase             | Monoclinic                                                                                                                                                                           |
| Space group tertiary phase                | <i>P</i> 2 <sub>1</sub> / <i>c</i>                                                                                                                                                   |
| Lattice parameter tertiary phase          | <i>a</i> = 6.720(4) Å<br><i>b</i> = 8.347(4) Å<br><i>c</i> = 9.032(5) Å<br><i>β</i> = 113.40(4)°                                                                                     |
| Volume tertiary phase                     | 464.9(2) Å <sup>3</sup>                                                                                                                                                              |
| Z tertiary phase                          | 4                                                                                                                                                                                    |
| Density (calculated) tertiary phase       | 3.179 g cm <sup>-3</sup>                                                                                                                                                             |
| <i>R</i> -factors                         | <i>R</i> <sub>wp</sub> = 0.0226<br><i>R</i> <sub>p</sub> = 0.0143<br><i>R</i> <sub>ex</sub> = 0.0052<br><i>R</i> <sub>F</sub> <sup>2</sup> = 0.2324<br><i>χ</i> <sup>2</sup> = 19.41 |
| No. of observations/restraints/parameters | 2223/0/51                                                                                                                                                                            |
| Total no. of reflections used             | 1531                                                                                                                                                                                 |

**Table S3.** Crystal and refinement parameters for the MNP active material electrode after discharging up to -2.4 V vs. AC and after charging up to -0.8 V vs. AC using Mg-electrolyte.

|                                      | -2.4 V                                                                                             | -0.8 V                                                                                              |
|--------------------------------------|----------------------------------------------------------------------------------------------------|-----------------------------------------------------------------------------------------------------|
| Nominal composition                  | Mg <sub>1.5</sub> Ni <sub>1.5</sub> O <sub>8</sub> P <sub>2</sub>                                  | Mg <sub>1.5</sub> Ni <sub>1.5</sub> O <sub>8</sub> P <sub>2</sub>                                   |
| Primary phase                        | (Mg <sub>0.5</sub> Ni <sub>0.5</sub> ) <sub>3</sub> (PO <sub>4</sub> ) <sub>2</sub>                | (Mg <sub>0.5</sub> Ni <sub>0.5</sub> ) <sub>3</sub> (PO <sub>4</sub> ) <sub>2</sub>                 |
| Weight fraction primary phase        | 0.565(6)                                                                                           | 0.569(4)                                                                                            |
| Formula weight primary phase         | 314.48 g mol <sup>-1</sup>                                                                         | 314.48 g mol <sup>-1</sup>                                                                          |
| Crystal system primary phase         | Monoclinic                                                                                         | Monoclinic                                                                                          |
| Space group primary phase            | <i>P2<sub>1</sub>/c</i>                                                                            | <i>P2<sub>1</sub>/c</i>                                                                             |
| Unit cell dimensions primary phase   | <i>a</i> = 5.8699(6) Å<br><i>b</i> = 4.6994(5) Å<br><i>c</i> = 10.150(1) Å<br><i>β</i> = 90.76(5)° | <i>a</i> = 5.8852(5) Å<br><i>b</i> = 4.7120(4) Å<br><i>c</i> = 10.1709(9) Å<br><i>β</i> = 90.77(2)° |
| Volume primary phase                 | 279.9(7) Å <sup>3</sup>                                                                            | 282.3(6) Å <sup>3</sup>                                                                             |
| Z primary phase                      | 2                                                                                                  | 2                                                                                                   |
| Density (calculated) primary phase   | 3.730 g cm <sup>-3</sup>                                                                           | 3.703 g cm <sup>-3</sup>                                                                            |
| Secondary phase                      | Cu                                                                                                 | Cu-Ni                                                                                               |
| Weight fraction secondary phase      | 0.253(7)                                                                                           | 0.379(4)                                                                                            |
| Formula weight secondary phase       | 63.55 g mol <sup>-1</sup>                                                                          | 63.55 g mol <sup>-1</sup>                                                                           |
| Crystal system secondary phase       | Cubic                                                                                              | Cubic                                                                                               |
| Space group secondary phase          | <i>Fm-3m</i>                                                                                       | <i>Fm-3m</i>                                                                                        |
| Lattice parameter secondary phase    | <i>a</i> = 3.6118(2) Å                                                                             | <i>a</i> = 3.61334(3) Å                                                                             |
| Volume secondary phase               | 47.11(6) Å <sup>3</sup>                                                                            | 47.17(7) Å <sup>3</sup>                                                                             |
| Z secondary phase                    | 4                                                                                                  | 4                                                                                                   |
| Density (calculated) secondary phase | 8.958 g cm <sup>-3</sup>                                                                           | 8.947 g cm <sup>-3</sup>                                                                            |
| Tertiary phase                       | Cu-Ni                                                                                              | Mg <sub>2</sub> P <sub>2</sub> O <sub>7</sub>                                                       |
| Weight fraction tertiary phase       | 0.090(8)                                                                                           | 0.051(2)                                                                                            |
| Formula weight tertiary phase        | 63.55 g mol <sup>-1</sup>                                                                          | 222.55 g mol <sup>-1</sup>                                                                          |
| Crystal system tertiary phase        | Cubic                                                                                              | Monoclinic                                                                                          |
| Space group tertiary phase           | <i>Fm-3m</i>                                                                                       | <i>P2<sub>1</sub>/c</i>                                                                             |
| Lattice parameter tertiary phase     | <i>a</i> = 3.6047(3) Å                                                                             | <i>a</i> = 6.735(6) Å<br><i>b</i> = 8.387(7) Å<br><i>c</i> = 9.003(8) Å<br><i>β</i> = 113.18(4)°    |
| Volume tertiary phase                | 46.84(1) Å <sup>3</sup>                                                                            | 467.5(3) Å <sup>3</sup>                                                                             |
| Z tertiary phase                     | 4                                                                                                  | 4                                                                                                   |
| Density (calculated) tertiary phase  | 2.324 g cm <sup>-3</sup>                                                                           | 3.163 g cm <sup>-3</sup>                                                                            |

**Table S3 continued.** Crystal and refinement parameters for the MNP active material electrode after discharging up to -2.4 V vs. AC and after charging up to -0.8 V vs. AC using Mg-electrolyte.

|                                           | -2.4 V                                                                                                                                                                               | -0.8 V                                                                                                                                                                               |
|-------------------------------------------|--------------------------------------------------------------------------------------------------------------------------------------------------------------------------------------|--------------------------------------------------------------------------------------------------------------------------------------------------------------------------------------|
| Fourth phase                              | Mg <sub>3</sub> (PO <sub>4</sub> ) <sub>2</sub>                                                                                                                                      |                                                                                                                                                                                      |
| Weight fraction fourth phase              | 0.044(6)                                                                                                                                                                             |                                                                                                                                                                                      |
| Formula weight fourth phase               | 314.48 g mol <sup>-1</sup>                                                                                                                                                           |                                                                                                                                                                                      |
| Crystal system fourth phase               | Monoclinic                                                                                                                                                                           |                                                                                                                                                                                      |
| Space group fourth phase                  | <i>P2<sub>1</sub>/c</i>                                                                                                                                                              |                                                                                                                                                                                      |
| Lattice parameter fourth phase            | <i>a</i> = 5.844(6) Å<br><i>b</i> = 4.770(6) Å<br><i>c</i> = 10.54(1) Å<br><i>β</i> = 91.79(9)°                                                                                      |                                                                                                                                                                                      |
| Volume fourth phase                       | 293.7(4) Å <sup>3</sup>                                                                                                                                                              |                                                                                                                                                                                      |
| Z fourth phase                            | 2                                                                                                                                                                                    |                                                                                                                                                                                      |
| Density (calculated) fourth phase         | 2.984 g cm <sup>-3</sup>                                                                                                                                                             |                                                                                                                                                                                      |
| Fifth phase                               | Mg <sub>2</sub> P <sub>2</sub> O <sub>7</sub>                                                                                                                                        |                                                                                                                                                                                      |
| Weight fraction fourth phase              | 0.045(3)                                                                                                                                                                             |                                                                                                                                                                                      |
| Formula weight fourth phase               | 222.55 g mol <sup>-1</sup>                                                                                                                                                           |                                                                                                                                                                                      |
| Crystal system fourth phase               | Monoclinic                                                                                                                                                                           |                                                                                                                                                                                      |
| Space group fourth phase                  | <i>P2<sub>1</sub>/c</i>                                                                                                                                                              |                                                                                                                                                                                      |
| Lattice parameter fourth phase            | <i>a</i> = 6.734(8) Å<br><i>b</i> = 8.333(9) Å<br><i>c</i> = 9.01(1) Å<br><i>β</i> = 113.20(6)°                                                                                      |                                                                                                                                                                                      |
| Volume fourth phase                       | 464.6(4) Å <sup>3</sup>                                                                                                                                                              |                                                                                                                                                                                      |
| Z fourth phase                            | 4                                                                                                                                                                                    |                                                                                                                                                                                      |
| Density (calculated) fourth phase         | 3.184 g cm <sup>-3</sup>                                                                                                                                                             |                                                                                                                                                                                      |
| <i>R</i> -factors                         | <i>R</i> <sub>wp</sub> = 0.0346<br><i>R</i> <sub>p</sub> = 0.0239<br><i>R</i> <sub>ex</sub> = 0.0070<br><i>R</i> <sub>F</sub> <sup>2</sup> = 0.1472<br><i>χ</i> <sup>2</sup> = 25.08 | <i>R</i> <sub>wp</sub> = 0.0308<br><i>R</i> <sub>p</sub> = 0.0197<br><i>R</i> <sub>ex</sub> = 0.0047<br><i>R</i> <sub>F</sub> <sup>2</sup> = 0.1773<br><i>χ</i> <sup>2</sup> = 44.34 |
| No. of observations/restraints/parameters | 2662/0/64                                                                                                                                                                            | 2692/0/49                                                                                                                                                                            |
| Total no. of reflections used             | 2186                                                                                                                                                                                 | 1596                                                                                                                                                                                 |

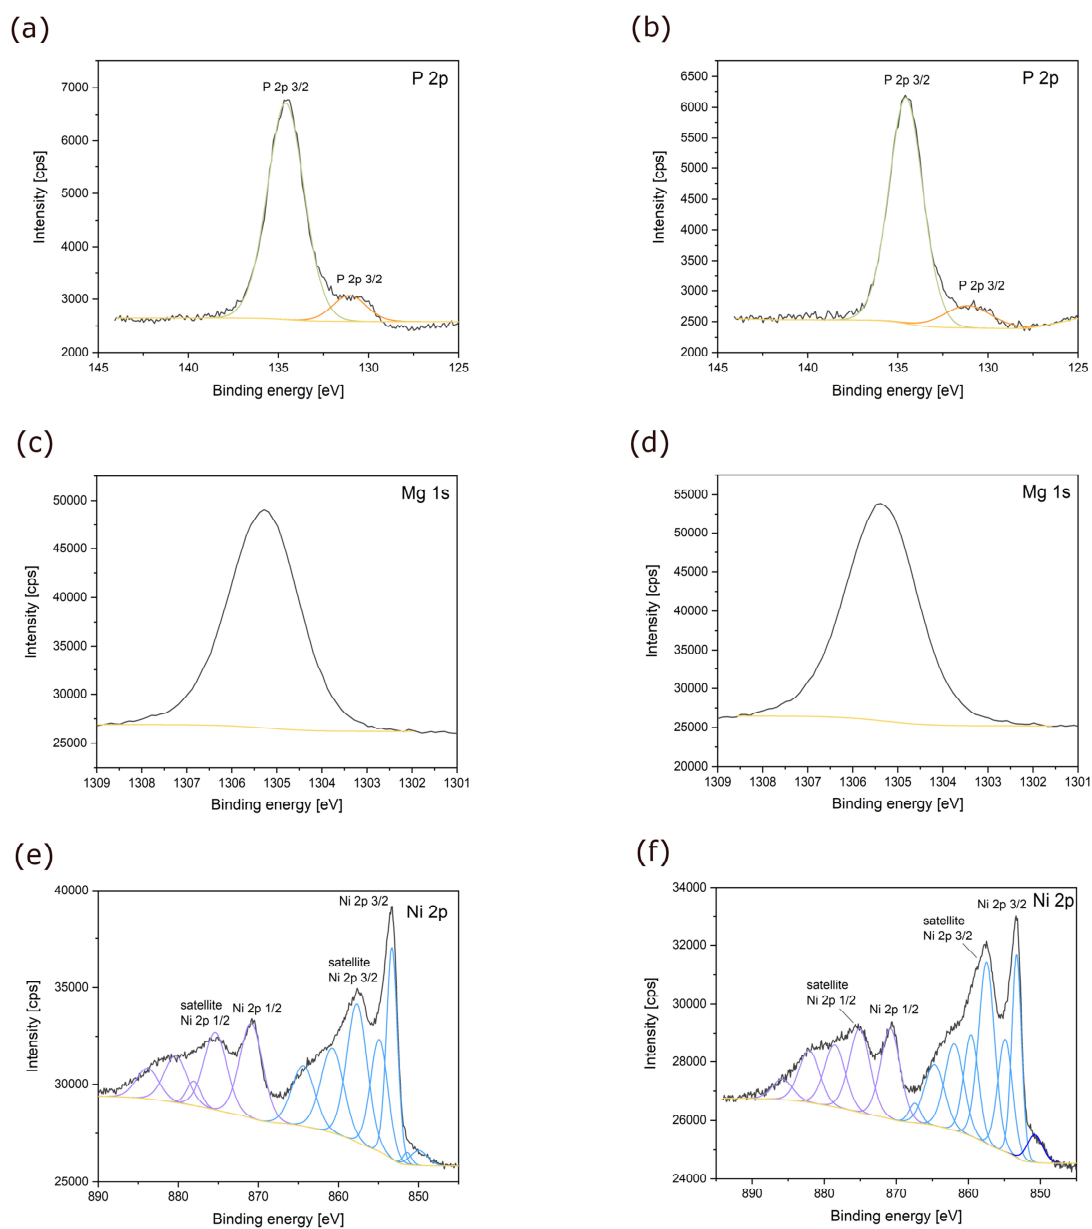

**Figure S5.** P 2p, Mg 1s and Ni 2p X-ray photoelectron spectra of MNP active material in (a, c and e, respectively) pristine and (b, d and f, respectively) discharged up to -2.4 V vs. AC electrodes using Mg-electrolyte.

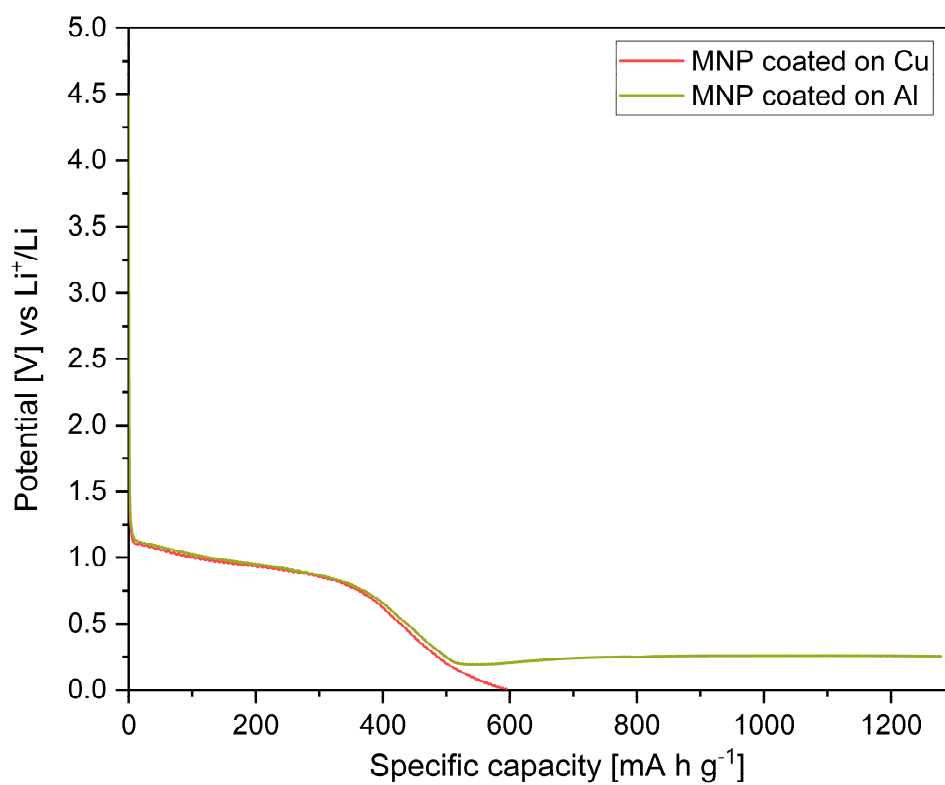

**Figure S6.** Discharge curves for MNP active material coated on Cu (red line) and Al (green line) current collectors cycled in a Li-half cell with Li-electrolyte.

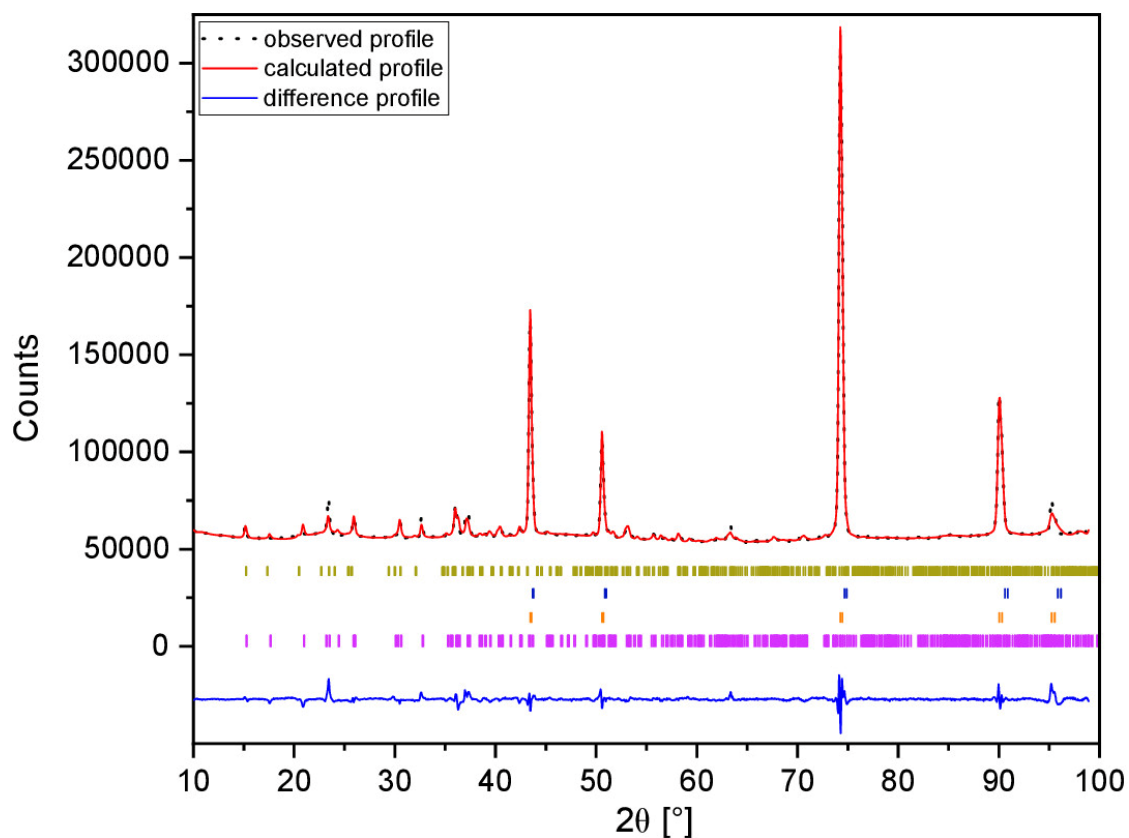

**Figure S7.** Fitted ex-situ XRD pattern of MNP active material discharged up to 1.0 vs.  $\text{Li}^+/\text{Li}$  in Li-electrolyte. Observed (black dots), calculated (red line) and difference (blue line) profiles are shown. Reflection positions for MNP (pink bars), Cu (orange bars), Cu–Ni alloy (blue bars) and sarcoside- $\text{Mg}_3(\text{PO}_4)_2$  (dark yellow bars) are indicated.

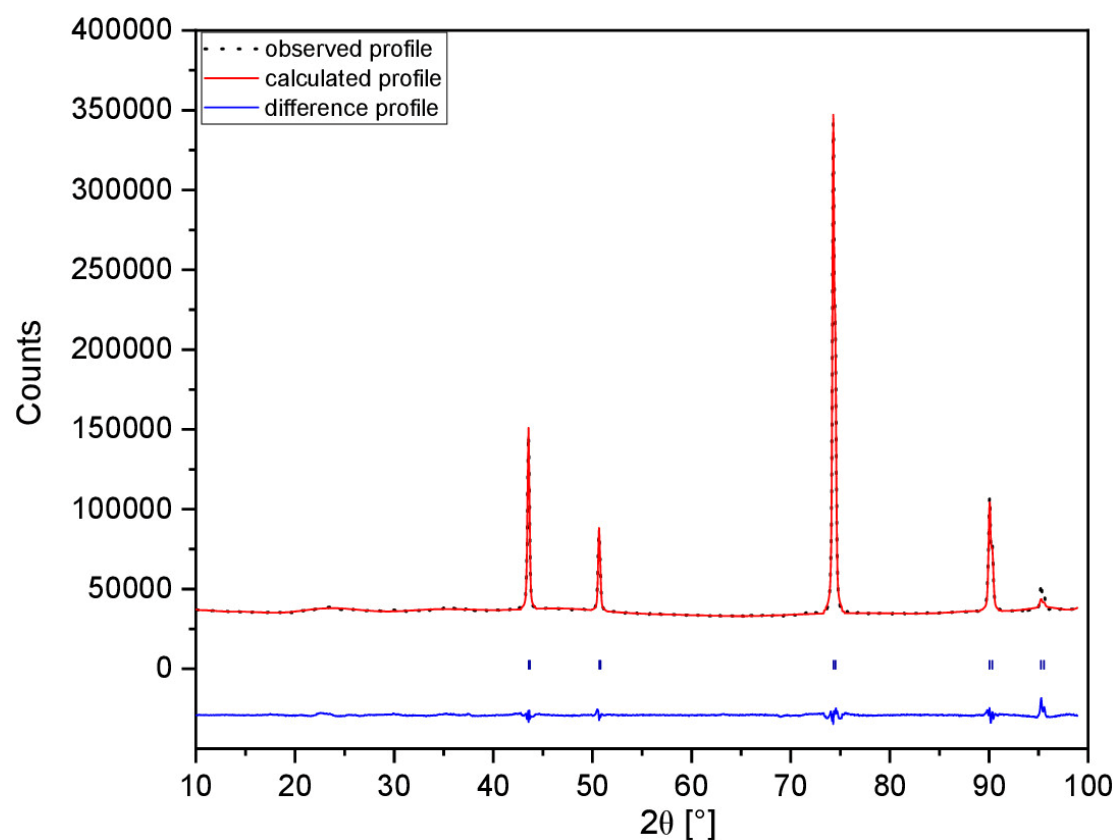

**Figure S8.** Fitted ex-situ XRD pattern of MNP active material discharged up to 0.8 vs.  $\text{Li}^+/\text{Li}$  in Li-electrolyte. Observed (black dots), calculated (red line) and difference (blue line) profiles are shown. Reflection positions for Cu–Ni alloy (blue bars) are indicated.

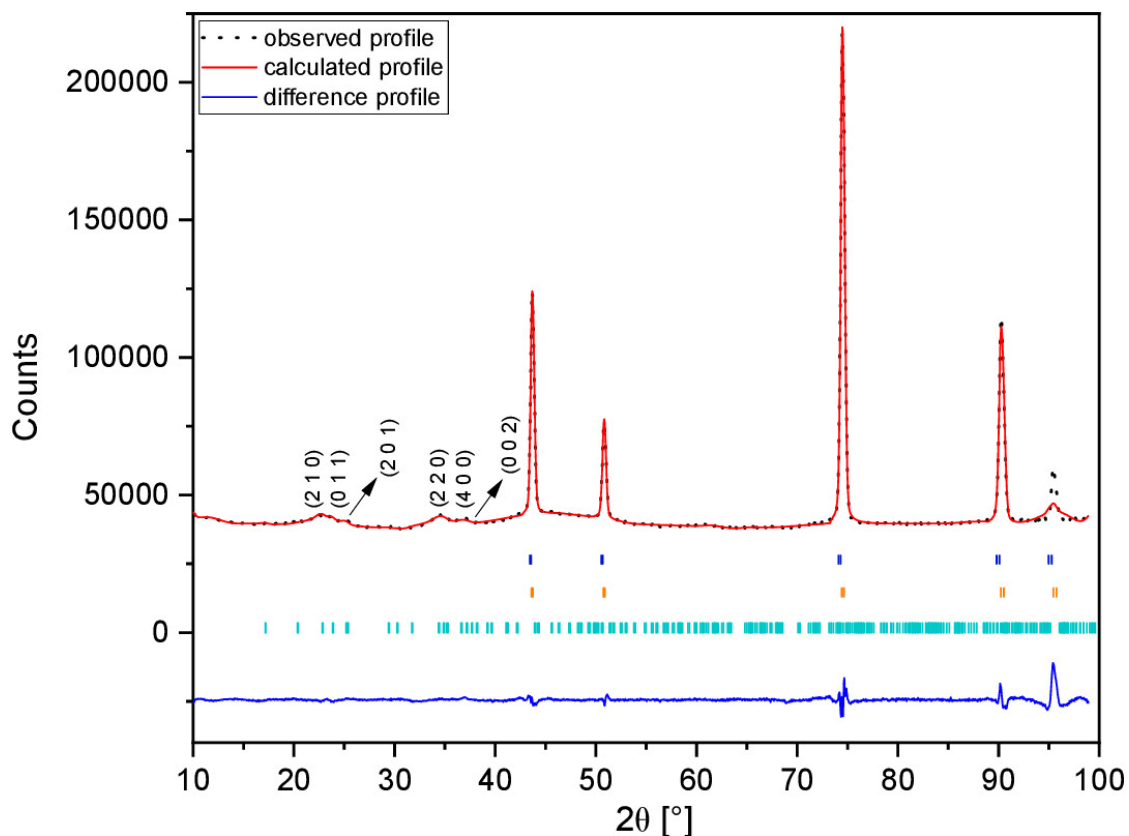

**Figure S9.** Fitted ex-situ XRD pattern of MNP active material discharged up to 0.01 vs.  $\text{Li}^+/\text{Li}$  in Li-electrolyte. Observed (black dots), calculated (red line) and difference (blue line) profiles are shown. Reflection positions for  $\text{Li}_3\text{PO}_4$  (cyan bars), Cu (orange bars) and Cu–Ni alloy (blue bars) are indicated. The strongest reflections for the  $\text{Li}_3\text{PO}_4$  phase are reported in brackets.

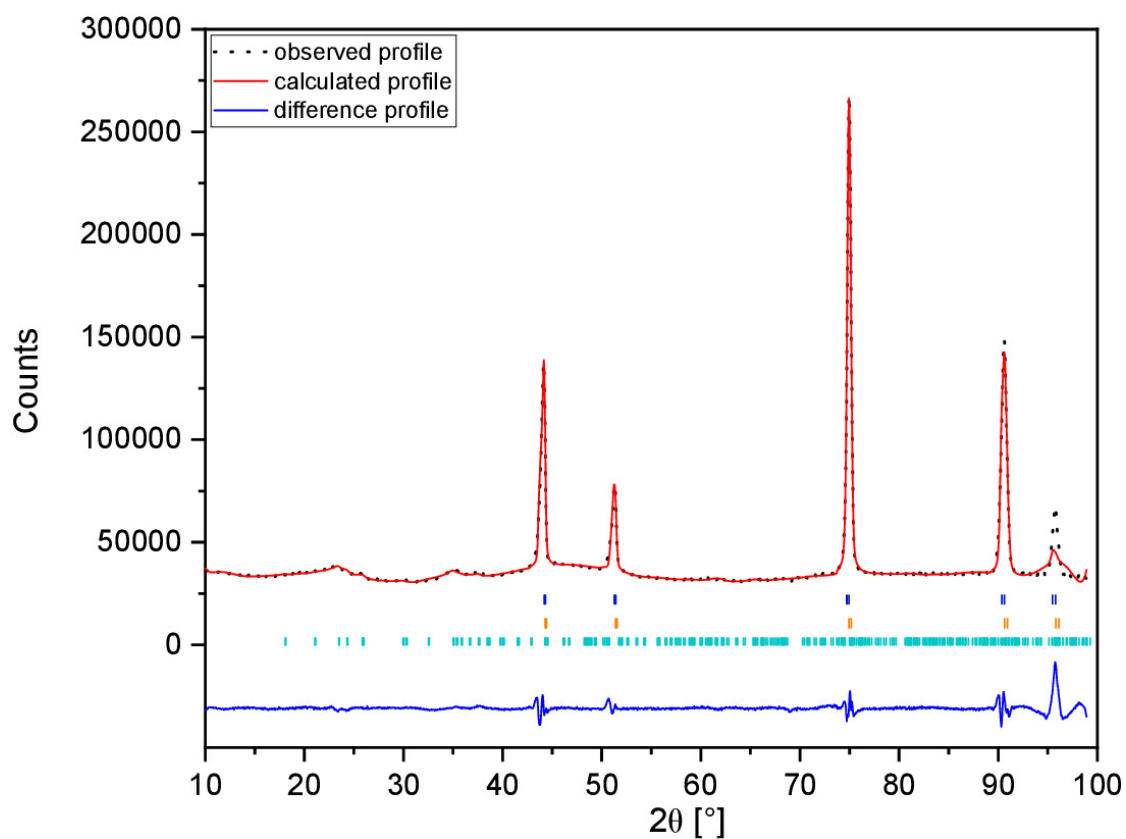

**Figure S10.** Fitted ex-situ XRD pattern of MNP active material charged up to 2.9 vs.  $\text{Li}^+/\text{Li}$  in Li-electrolyte. Observed (black dots), calculated (red line) and difference (blue line) profiles are shown. Reflection positions for  $\text{Li}_3\text{PO}_4$  (cyan bars), Cu (orange bars) and Cu–Ni alloy (blue bars) are indicated.

**Table S4.** Crystal and refinement parameters for the MNP active material discharged up to 1.0 vs. Li<sup>+</sup>/Li, discharged up to 0.8 vs. Li<sup>+</sup>/Li and fully discharged at 0.01 V vs. Li<sup>+</sup>/Li in Li-electrolyte.

|                                      | 1.0 V                                                                                            | 0.8 V                                                             | 0.01 V                                                                |
|--------------------------------------|--------------------------------------------------------------------------------------------------|-------------------------------------------------------------------|-----------------------------------------------------------------------|
| Nominal composition                  | Mg <sub>1.5</sub> Ni <sub>1.5</sub> O <sub>8</sub> P <sub>2</sub>                                | Mg <sub>1.5</sub> Ni <sub>1.5</sub> O <sub>8</sub> P <sub>2</sub> | Mg <sub>1.5</sub> Ni <sub>1.5</sub> O <sub>8</sub> P <sub>2</sub>     |
| Primary phase                        | (Mg <sub>0.5</sub> Ni <sub>0.5</sub> ) <sub>3</sub> (PO <sub>4</sub> ) <sub>2</sub>              | Cu                                                                | Li <sub>3</sub> PO <sub>4</sub>                                       |
| Weight fraction primary phase        | 0.43(3)                                                                                          | 1                                                                 | 0.14(9)                                                               |
| Formula weight primary phase         | 314.48 g mol <sup>-1</sup>                                                                       | 63.55 g mol <sup>-1</sup>                                         | 115.79 g mol <sup>-1</sup>                                            |
| Crystal system primary phase         | Monoclinic                                                                                       | Cubic                                                             | Orthorhombic                                                          |
| Space group primary phase            | <i>P2<sub>1</sub>/c</i>                                                                          | <i>Fm-3m</i>                                                      | <i>Pnma</i>                                                           |
| Unit cell dimensions primary phase   | <i>a</i> = 5.878(2) Å<br><i>b</i> = 4.707(2) Å<br><i>c</i> = 10.157(3) Å<br><i>β</i> = 90.75(2)° | <i>a</i> = 3.62216(8) Å                                           | <i>a</i> = 10.52(4) Å<br><i>b</i> = 5.97(2) Å<br><i>c</i> = 4.88(1) Å |
| Volume primary phase                 | 281.0(2) Å <sup>3</sup>                                                                          | 47.523(3) Å <sup>3</sup>                                          | 306.(1) Å <sup>3</sup>                                                |
| Z primary phase                      | 2                                                                                                | 4                                                                 | 4                                                                     |
| Density (calculated) primary phase   | 3.718 g cm <sup>-3</sup>                                                                         | 8.882 g cm <sup>-3</sup>                                          | 2.513 g cm <sup>-3</sup>                                              |
| Secondary phase                      | Cu                                                                                               |                                                                   | Cu                                                                    |
| Weight fraction secondary phase      | 0.480(0)                                                                                         |                                                                   | 0.84(4)                                                               |
| Formula weight secondary phase       | 63.55 g mol <sup>-1</sup>                                                                        |                                                                   | 63.55 g mol <sup>-1</sup>                                             |
| Crystal system secondary phase       | Cubic                                                                                            |                                                                   | Cubic                                                                 |
| Space group secondary phase          | <i>Fm-3m</i>                                                                                     |                                                                   | <i>Fm-3m</i>                                                          |
| Lattice parameter secondary phase    | <i>a</i> = 3.61800(2) Å                                                                          |                                                                   | <i>a</i> = 3.6156(4) Å                                                |
| Volume secondary phase               | 47.36(1) Å <sup>3</sup>                                                                          |                                                                   | 47.27(1) Å <sup>3</sup>                                               |
| Z secondary phase                    | 4                                                                                                |                                                                   | 4                                                                     |
| Density (calculated) secondary phase | 8.913 g cm <sup>-3</sup>                                                                         |                                                                   | 8.930 g cm <sup>-3</sup>                                              |
| Tertiary phase                       | Cu–Ni                                                                                            |                                                                   | Cu–Ni                                                                 |
| Weight fraction tertiary phase       | 0.016(3)                                                                                         |                                                                   | 0.00(7)                                                               |
| Formula weight tertiary phase        | 63.55 g mol <sup>-1</sup>                                                                        |                                                                   | 63.55 g mol <sup>-1</sup>                                             |
| Crystal system tertiary phase        | Cubic                                                                                            |                                                                   | Cubic                                                                 |
| Space group tertiary phase           | <i>Fm-3m</i>                                                                                     |                                                                   | <i>Fm-3m</i>                                                          |
| Lattice parameter tertiary phase     | <i>a</i> = 3.6003(2) Å                                                                           |                                                                   | <i>a</i> = 3.6293(7) Å                                                |
| Volume tertiary phase                | 46.67(2) Å <sup>3</sup>                                                                          |                                                                   | 47.80(3) Å <sup>3</sup>                                               |
| Z tertiary phase                     | 4                                                                                                |                                                                   | 4                                                                     |
| Density (calculated) tertiary phase  | 8.354 g cm <sup>-3</sup>                                                                         |                                                                   | 8.830 g cm <sup>-3</sup>                                              |

**Table S4 continued.** Crystal and refinement parameters for the MNP active material discharged up to 1.0 vs. Li<sup>+</sup>/Li, discharged up to 0.8 vs. Li<sup>+</sup>/Li and fully discharged at 0.01 V vs. Li<sup>+</sup>/Li in Li-electrolyte.

|                                           | 1.0 V                                                                                                                                                                                | 0.8 V                                                                                                                                                                                | 0.01 V                                                                                                                                                                               |
|-------------------------------------------|--------------------------------------------------------------------------------------------------------------------------------------------------------------------------------------|--------------------------------------------------------------------------------------------------------------------------------------------------------------------------------------|--------------------------------------------------------------------------------------------------------------------------------------------------------------------------------------|
| Fourth phase                              | Mg <sub>3</sub> (PO <sub>4</sub> ) <sub>2</sub>                                                                                                                                      |                                                                                                                                                                                      |                                                                                                                                                                                      |
| Weight fraction fourth phase              | 0.070(7)                                                                                                                                                                             |                                                                                                                                                                                      |                                                                                                                                                                                      |
| Formula weight fourth phase               | 314.48 g mol <sup>-1</sup>                                                                                                                                                           |                                                                                                                                                                                      |                                                                                                                                                                                      |
| Crystal system fourth phase               | Monoclinic                                                                                                                                                                           |                                                                                                                                                                                      |                                                                                                                                                                                      |
| Space group fourth phase                  | <i>P</i> 2 <sub>1</sub> / <i>c</i>                                                                                                                                                   |                                                                                                                                                                                      |                                                                                                                                                                                      |
| Lattice parameter fourth phase            | <i>a</i> = 5.869(7) Å<br><i>b</i> = 4.841(6) Å<br><i>c</i> = 10.34(1) Å<br><i>β</i> = 92.2(1)°                                                                                       |                                                                                                                                                                                      |                                                                                                                                                                                      |
| Volume fourth phase                       | 293.4(4) Å <sup>3</sup>                                                                                                                                                              |                                                                                                                                                                                      |                                                                                                                                                                                      |
| Z fourth phase                            | 2                                                                                                                                                                                    |                                                                                                                                                                                      |                                                                                                                                                                                      |
| Density (calculated) fourth phase         | 2.966 g cm <sup>-3</sup>                                                                                                                                                             |                                                                                                                                                                                      |                                                                                                                                                                                      |
| <i>R</i> -factors                         | <i>R</i> <sub>wp</sub> = 0.0268<br><i>R</i> <sub>p</sub> = 0.0168<br><i>R</i> <sub>ex</sub> = 0.0054<br><i>R</i> <sub>F</sub> <sup>2</sup> = 0.1830<br><i>χ</i> <sup>2</sup> = 25.74 | <i>R</i> <sub>wp</sub> = 0.0170<br><i>R</i> <sub>p</sub> = 0.0102<br><i>R</i> <sub>ex</sub> = 0.0051<br><i>R</i> <sub>F</sub> <sup>2</sup> = 0.0245<br><i>χ</i> <sup>2</sup> = 11.16 | <i>R</i> <sub>wp</sub> = 0.0313<br><i>R</i> <sub>p</sub> = 0.0161<br><i>R</i> <sub>ex</sub> = 0.0060<br><i>R</i> <sub>F</sub> <sup>2</sup> = 0.1376<br><i>χ</i> <sup>2</sup> = 27.56 |
| No. of observations/restraints/parameters | 2224/0/72                                                                                                                                                                            | 2224/0/36                                                                                                                                                                            | 2224/0/49                                                                                                                                                                            |
| Total no. of reflections used             | 1225                                                                                                                                                                                 | 2223                                                                                                                                                                                 | 420                                                                                                                                                                                  |

**Table S5.** Crystal and refinement parameters for the MNP active material charged up to 2.9 vs. Li<sup>+</sup>/Li in Li-electrolyte.

|                                           |                                                                                                  |
|-------------------------------------------|--------------------------------------------------------------------------------------------------|
| Nominal composition                       | Mg <sub>1.5</sub> Ni <sub>1.5</sub> O <sub>8</sub> P <sub>2</sub>                                |
| Primary phase                             | Li <sub>3</sub> PO <sub>4</sub>                                                                  |
| Weight fraction primary phase             | 0.03(2)                                                                                          |
| Formula weight primary phase              | 115.79 g mol <sup>-1</sup>                                                                       |
| Crystal system primary phase              | Orthorhombic                                                                                     |
| Space group primary phase                 | <i>Pnma</i>                                                                                      |
| Unit cell dimensions primary phase        | $a = 10.49(3) \text{ \AA}$<br>$b = 6.13(2) \text{ \AA}$<br>$c = 4.93(1) \text{ \AA}$             |
| Volume primary phase                      | 318.(1) Å <sup>3</sup>                                                                           |
| Z primary phase                           | 4                                                                                                |
| Density (calculated) primary phase        | 2.422 g cm <sup>-3</sup>                                                                         |
| Secondary phase                           | Cu                                                                                               |
| Weight fraction secondary phase           | 0.94(1)                                                                                          |
| Formula weight secondary phase            | 63.55 g mol <sup>-1</sup>                                                                        |
| Crystal system secondary phase            | Cubic                                                                                            |
| Space group secondary phase               | <i>Fm-3m</i>                                                                                     |
| Lattice parameter secondary phase         | $a = 3.6303(5) \text{ \AA}$                                                                      |
| Volume secondary phase                    | 47.85(2) Å <sup>3</sup>                                                                          |
| Z secondary phase                         | 4                                                                                                |
| Density (calculated) secondary phase      | 8.822 g cm <sup>-3</sup>                                                                         |
| Tertiary phase                            | Cu–Ni                                                                                            |
| Weight fraction tertiary phase            | 0.02 (7)                                                                                         |
| Formula weight tertiary phase             | 63.55 g mol <sup>-1</sup>                                                                        |
| Crystal system tertiary phase             | Cubic                                                                                            |
| Space group tertiary phase                | <i>Fm-3m</i>                                                                                     |
| Lattice parameter tertiary phase          | $a = 3.6399(5) \text{ \AA}$                                                                      |
| Volume tertiary phase                     | 48.22(2) Å <sup>3</sup>                                                                          |
| Z tertiary phase                          | 4                                                                                                |
| Density (calculated) tertiary phase       | 8.753 g cm <sup>-3</sup>                                                                         |
| <i>R</i> -factors                         | $R_{wp} = 0.0399$<br>$R_p = 0.0203$<br>$R_{ex} = 0.0051$<br>$R_F^2 = 0.2010$<br>$\chi^2 = 61.49$ |
| No. of observations/restraints/parameters | 2224/0/48                                                                                        |
| Total no. of reflections used             | 406                                                                                              |

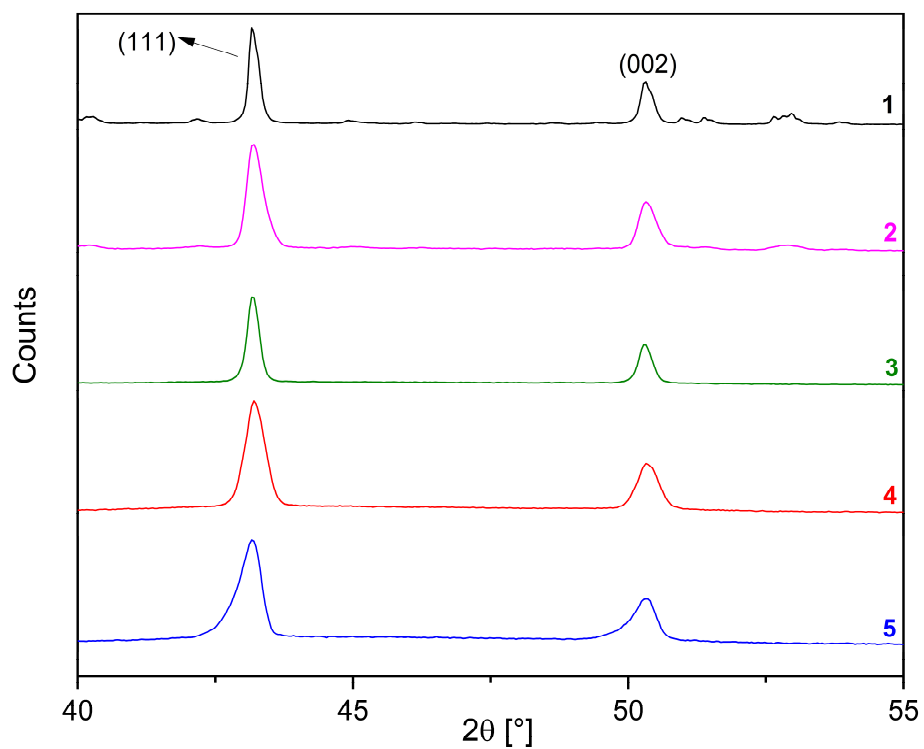

**Figure S11.** *Ex-situ* XRD patterns comparing the (1 1 1) and (0 0 2) reflections of the Cu current collector for the MNP electrode at the open circuit voltage (3.0 V vs.  $\text{Li}^+/\text{Li}$ , black curve, 1), discharged up to 1.0 vs.  $\text{Li}^+/\text{Li}$  (pink curve, 2), discharged up to 0.8 vs.  $\text{Li}^+/\text{Li}$  (green curve, 3), fully discharged (0.01 V vs.  $\text{Li}^+/\text{Li}$ , 4) and fully charged (2.9 V vs.  $\text{Li}^+/\text{Li}$ , 5) states using Li-electrolyte.

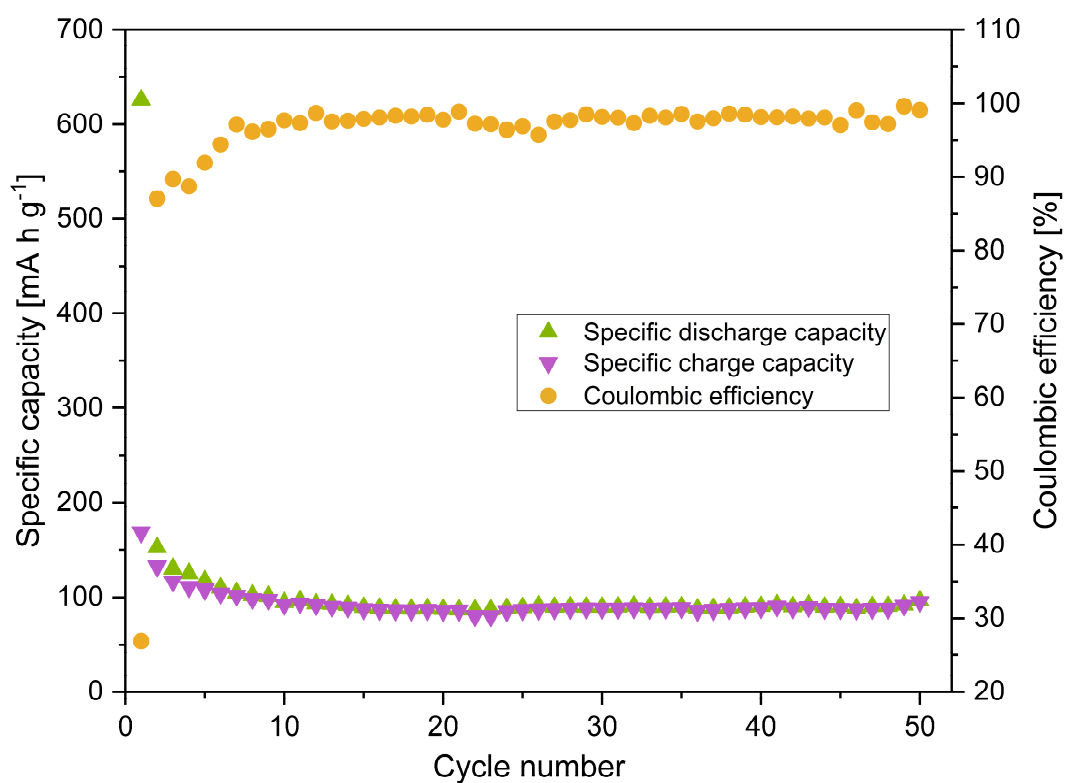

**Figure S12.** Specific discharge (green triangles) and charge (pink triangles) capacities over 50 cycles for discharge curves for MNP active material cycled in a Li-half cell with Li-electrolyte.

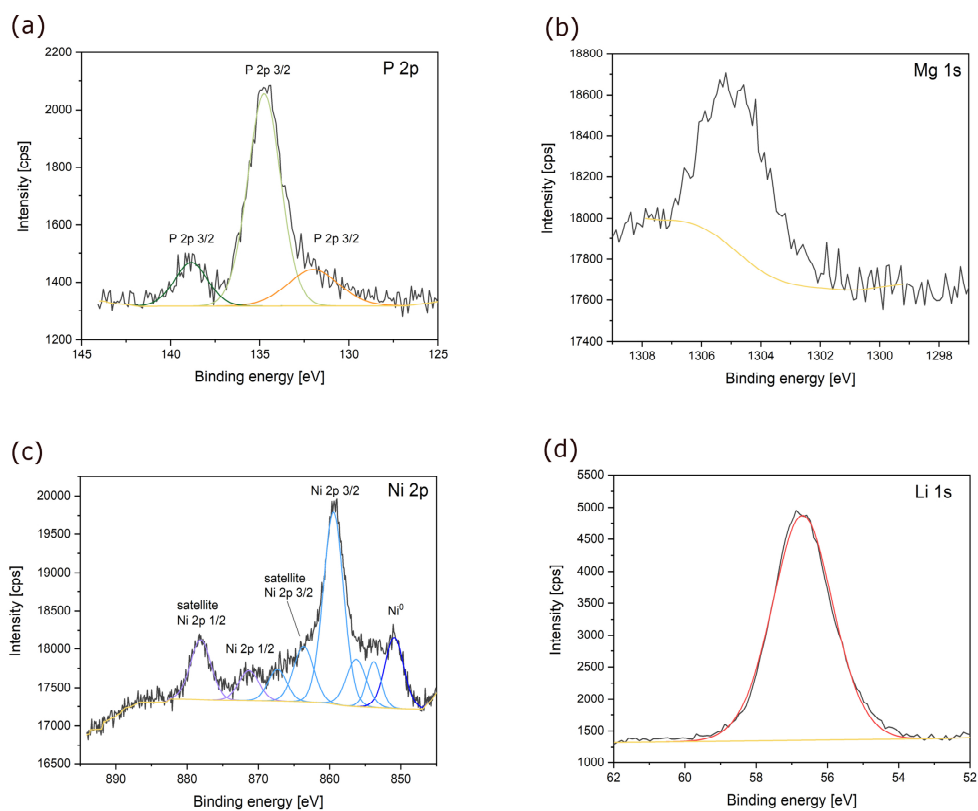

**Figure S13.** (a) P 2p, (b) Mg 1s, (c) Ni 2p and (d) Li 1s X-ray photoelectron spectra for MNP active material discharged up to 0.01 V vs.  $\text{Li}^+/\text{Li}$  in Li-electrolyte.

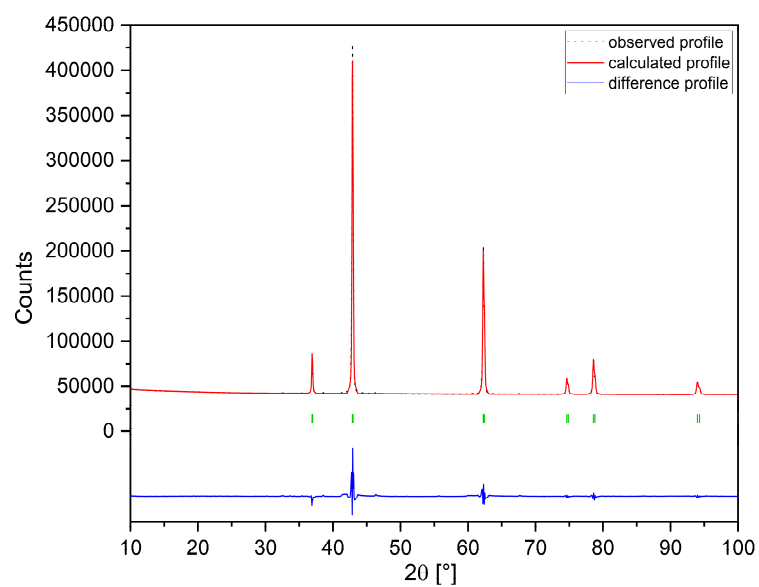

**Figure S14.** Fitted XRD pattern of MgO precursor. Observed (black dots), calculated (red line) and difference (blue line) profiles are shown. Reflection positions for MgO (green bars) are indicated.
